# Supplementary material
Source: Springer Nature journal article supplement (https://www.springermedizin.de/resource/supplementary/12889_2012_5518_MOESM2_ESM.pdf/9495432)

## Panel A. Men

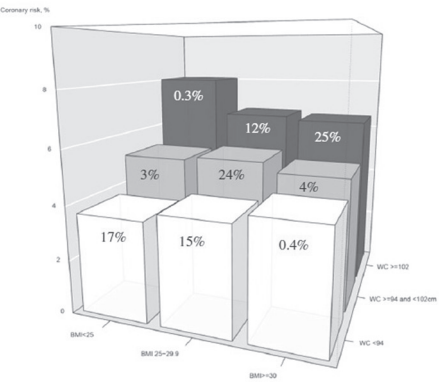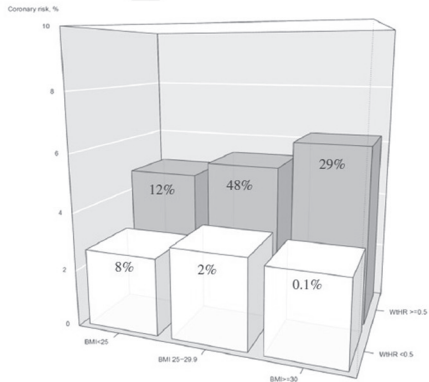

## Panel B. Women

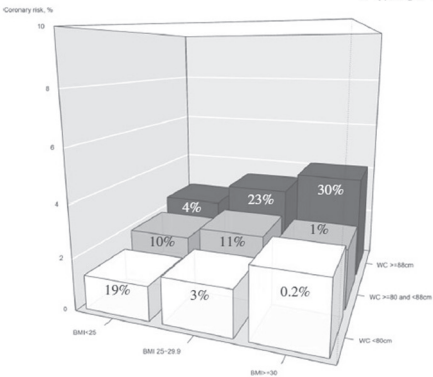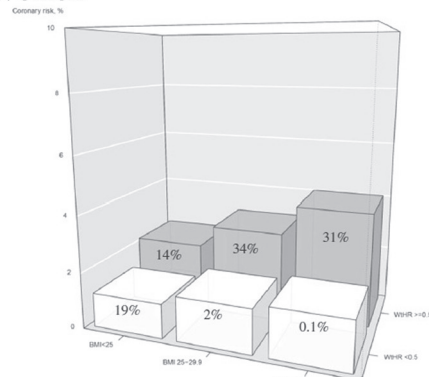

Supplement: MOESM2 [file 9495432]
